# Supplementary material for: Neuroimaging Findings in Adolescents and Young Adults with Anorexia Nervosa: A Systematic Review
Source: PubMed Central journal article supplement (PMC7918703; doi:10.3390/children8020137), 2021-02-12
Supplement: children-08-00137-s001.pdf [file children-08-00137-s001.pdf]

**Table S1.** Studies excluded, with their reason for exclusion

| <i>Study</i>                   | <i>Title</i>                                                                                                                                                                   | <i>Reason for exclusion</i>                                   |
|--------------------------------|--------------------------------------------------------------------------------------------------------------------------------------------------------------------------------|---------------------------------------------------------------|
| <b>Bomba (2013)</b>            | Impact of speed and magnitude of weight loss on the development of brain trophic changes in adolescents with anorexia nervosa: a case control study.                           | Comorbidity (patient with celiac disease)                     |
| <b>Swayze (1996)</b>           | Reversibility of brain tissue loss in anorexia nervosa assessed with a computerized Talairach 3-D proportional grid                                                            | Diagnosis of AN is not established through official criteria. |
| <b>Boto (2017)</b>             | Evaluating anorexia-related brain atrophy using MP2RAGE-based morphometry.                                                                                                     | Diagnosis of AN is not established through official criteria. |
| <b>Dolan (1988)</b>            | Structural brain changes in patients with anorexia nervosa                                                                                                                     | Diagnosis of AN is not established through official criteria. |
| <b>Artmann (1985)</b>          | Reversible and non-reversible enlargement of cerebrospinal fluid spaces in anorexia nervosa                                                                                    | Diagnosis of AN is not established through official criteria. |
| <b>Kohlmeyer (1983)</b>        | Computed tomography of anorexia nervosa.                                                                                                                                       | Diagnosis of AN is not established through official criteria. |
| <b>Wallace (2019)</b>          | Subclinical eating disorder traits are correlated with cortical thickness in regions associated with food reward and perception.                                               | Diagnosis of AN is not established through official criteria. |
| <b>Cowdhury (2003)</b>         | Early-Onset Anorexia Nervosa: Is There Evidence of Limbic System Imbalance?                                                                                                    | Diagnosis of AN is not established through official criteria. |
| <b>Rothemud (2011)</b>         | Compulsivity Predicts Fronto Striatal Activation in Severely Anorectic Individuals                                                                                             | fMRI after stimulation.                                       |
| <b>Schulte-Rüther (2012)</b>   | Theory of Mind and the Brain in Anorexia Nervosa: Relation to Treatment Outcome                                                                                                | fMRI after stimulation.                                       |
| <b>Lao-Kaim (2014)</b>         | Functional MRI Investigation of Verbal Working Memory in Adults With Anorexia Nervosa                                                                                          | fMRI after stimulation.                                       |
| <b>Bischoff-Grethe (2013)</b>  | Altered Brain Response to Reward and Punishment in Adolescents With Anorexia Nervosa                                                                                           | fMRI after stimulation.                                       |
| <b>Fladung (2013)</b>          | Role of the Ventral Striatum in Developing Anorexia Nervosa                                                                                                                    | fMRI after stimulation.                                       |
| <b>McFadden (2014)</b>         | Reduced Salience and Default Mode Network Activity in Women With Anorexia Nervosa                                                                                              | fMRI after stimulation.                                       |
| <b>Nagahara (2014)</b>         | A Tract-Based Spatial Statistics Study in Anorexia Nervosa: Abnormality in the Fornix and the Cerebellum                                                                       | fMRI after stimulation.                                       |
| <b>Lao-Kaim (2015)</b>         | Aberrant Function of Learning and Cognitive Control Networks Underlie Inefficient Cognitive Flexibility in Anorexia Nervosa: A Cross-Sectional fMRI Study                      | fMRI after stimulation.                                       |
| <b>Frank (2016)</b>            | Altered structural and effective connectivity in anorexia and bulimia nervosa in circuits that regulate energy and reward homeostasis.                                         | fMRI after stimulation.                                       |
| <b>Hildebrandt (2018)</b>      | Evidence of prefrontal hyperactivation to food-cue reversal learning in adolescents with anorexia nervosa.                                                                     | fMRI after stimulation.                                       |
| <b>Bohon (2019)</b>            | Performance and brain activity during the Wisconsin Card Sorting Test in adolescents with obsessive-compulsive disorder and adolescents with weight-restored anorexia nervosa. | fMRI after stimulation.                                       |
| <b>Castro-Fornieles (2019)</b> | Functional MRI with a set-shifting task in adolescent anorexia nervosa: A cross-sectional and follow-up study.                                                                 | fMRI after stimulation.                                       |
| <b>Horster (2020)</b>          | A Neglected Topic in Neuroscience: Replicability of fMRI Results With Specific Reference to ANOREXIA NERVOSA                                                                   | fMRI after stimulation.                                       |
| <b>Doose (2020)</b>            | Strengthened default mode network activation during delay discounting in adolescents with anorexia nervosa after partial weight restoration: A longitudinal FMRI study         | fMRI after stimulation.                                       |
| <b>Castro-Fornieles (2010)</b> | A cross-sectional and follow-up functional MRI study with a working memory task in adolescent anorexia nervosa                                                                 | fMRI after stimulation.                                       |
| <b>Leppanen (2017)</b>         | Blunted neural response to implicit negative facial affect in anorexia nervosa                                                                                                 | fMRI after stimulation.                                       |
| <b>Seidel (2017)</b>           | Processing and regulation of negative emotions in anorexia nervosa: An fMRI study                                                                                              | fMRI after stimulation.                                       |
| <b>Zutphen (2019)</b>          | Intimate stimuli result in fronto-parietal activation changes in anorexia nervosa                                                                                              | fMRI after stimulation.                                       |

|                         |                                                                                                                                                                     |                                         |
|-------------------------|---------------------------------------------------------------------------------------------------------------------------------------------------------------------|-----------------------------------------|
| <b>Maier (2019)</b>     | Neurobiological signature of intimacy in anorexia nervosa                                                                                                           | fMRI after stimulation.                 |
| <b>Steward (2020)</b>   | Dorsolateral prefrontal cortex and amygdala function during cognitive reappraisal predicts weight restoration and emotion regulation impairment in anorexia nervosa | fMRI after stimulation.                 |
| <b>Horndasch(2020)</b>  | Neural mechanisms of perceptive and affective processing of body stimuli in anorexia nervosa - are there developmental effects?                                     | fMRI after stimulation.                 |
| <b>Olivo(2019)</b>      | Functional connectivity underlying hedonic response to food in female adolescents with atypical AN: the role of somatosensory and salience networks.                | fMRI after stimulation.                 |
| <b>Sheng (2015)</b>     | Cerebral Perfusion Differences in Women Currently With and Recovered From Anorexia Nervosa                                                                          | Patients under psychotropic medication. |
| <b>Kingston (1996)</b>  | Neuropsychological and structural brain changes in anorexia nervosa before and after refeeding                                                                      | Patients under psychotropic medication. |
| <b>Yonezawa (2008)</b>  | No differences are seen in the regional cerebral blood flow in the restricting type of anorexia nervosa compared with the binge eating/purging type                 | Patients under psychotropic medication. |
| <b>Olivo (2018)</b>     | Reduced resting-state connectivity in areas involved in processing of face-related social cues in female adolescents with atypical anorexia nervosa.                | Patients under psychotropic medication. |
| <b>Zucker (2017)</b>    | The Clinical Significance of Posterior Insular Volume in Adolescent Anorexia Nervosa.                                                                               | Patients under psychotropic medication. |
| <b>Gaudio (2011)</b>    | Gray matter decrease distribution in the early stages of Anorexia Nervosa restrictive type in adolescents.                                                          | Patients under psychotropic medication. |
| <b>Kazlouski (2011)</b> | Altered fimbria-fornix white matter integrity in anorexia nervosa predicts harm avoidan                                                                             | Patients under psychotropic medication. |
| <b>Mainz (2012)</b>     | Structural Brain Abnormalities in Adolescent Anorexia Nervosa Before and After Weight Recovery and Associated Hormonal Changes                                      | Patients under psychotropic medication. |
| <b>Frank (2013)</b>     | Localized Brain Volume and White Matter Integrity Alterations in Adolescent Anorexia Nervosa                                                                        | Patients under psychotropic medication. |
| <b>Seitz (2015)</b>     | Brain Volume Reduction Predicts Weight Development in Adolescent Patients With Anorexia Nervosa                                                                     | Patients under psychotropic medication. |
| <b>Phillipou (2016)</b> | Resting State Functional Connectivity in Anorexia Nervosa                                                                                                           | Patients under psychotropic medication. |
| <b>Phillipou (2018)</b> | Differences in regional grey matter volumes in currently ill patients with anorexia nervosa.                                                                        | Patients under psychotropic medication. |
| <b>Lavagnino (2018)</b> | Cortical thickness patterns as state biomarker of anorexia nervosa.                                                                                                 | Patients under psychotropic medication. |
| <b>Kaufmann (2017)</b>  | Fornix Under Water? Ventricular Enlargement Biases Forniceal Diffusion Magnetic Resonance Imaging Indices in Anorexia Nervosa.                                      | Patients under psychotropic medication. |
| <b>Miles (2018)</b>     | Subcortical volume and cortical surface architecture in women with acute and remitted anorexia nervosa: An exploratory neuroimaging study.                          | Patients under psychotropic medication. |
| <b>Rastam (2001)</b>    | Regional cerebral blood flow in weight-restored anorexia nervosa: a preliminary study.                                                                              | Psychiatric co-morbidity.               |
| <b>Lankenau (1985)</b>  | Cranial CT Scans in Eating Disorder Patients and Controls                                                                                                           | Psychiatric co-morbidity.               |
| <b>Phillipou (2018)</b> | White matter microstructure in anorexia nervosa.                                                                                                                    | Psychiatric co-morbidity.               |
| <b>Ehrlich (2015)</b>   | Reduced Functional Connectivity in the Thalamo-Insular Subnetwork in Patients With Acute Anorexia Nervosa                                                           | Psychiatric co-morbidity.               |
| <b>Biezonski (2016)</b> | Evidence for Thalamocortical Circuit Abnormalities and Associated Cognitive Dysfunctions in Underweight Individuals With Anorexia Nervosa                           | Psychiatric co-morbidity.               |
| <b>Krieg (1989)</b>     | Brain Morphology and Regional Cerebral Blood Flow in Anorexia Nervosa                                                                                               | Sample out of age range.                |
| <b>Uniacke (2019)</b>   | Resting-state connectivity within and across neural circuits in anorexia nervosa                                                                                    | Sample out of age range.                |
| <b>Cha (2016)</b>       | Abnormal Reward Circuitry in Anorexia Nervosa: A Longitudinal, Multimodal MRI Study                                                                                 | Sample out of age range.                |
| <b>Burkert (2019)</b>   | Body image disturbances, fear and associations with the amygdala in anorexia nervosa.                                                                               | Sample out of age range.                |

|                                 |                                                                                                                                                                                              |                          |
|---------------------------------|----------------------------------------------------------------------------------------------------------------------------------------------------------------------------------------------|--------------------------|
| <b><i>Bernardoni (2018)</i></b> | Nutritional status affects cortical folding: Lessons learned from anorexia nervosa                                                                                                           | Sample out of age range. |
| <b><i>Doraiswamy (1990)</i></b> | A brain magnetic resonance imaging study of pituitary gland morphology in anorexia nervosa and bulimia.                                                                                      | Sample out of age range. |
| <b><i>Boghi (2011)</i></b>      | In vivo evidence of global and focal brain alterations in anorexia nervosa.                                                                                                                  | Sample out of age range. |
| <b><i>Brooks (2011)</i></b>     | Restraint of appetite and reduced regional brain volumes in anorexia nervosa: a voxel-based morphometric study.                                                                              | Sample out of age range. |
| <b><i>Burkert (2015)</i></b>    | Structural hippocampal alterations, perceived stress, and coping deficiencies in patients with anorexia nervosa.                                                                             | Sample out of age range. |
| <b><i>Agata (2015)</i></b>      | Brain correlates of alexithymia in eating disorders: A voxel-based morphometry study.                                                                                                        | Sample out of age range. |
| <b><i>Amianto (2013)</i></b>    | Brain volumetric abnormalities in patients with anorexia and bulimia nervosa: a voxel-based morphometry study.                                                                               | Sample out of age range. |
| <b><i>Lavagnino (2016)</i></b>  | The relationship between cortical thickness and body mass index differs between women with anorexia nervosa and healthy controls.                                                            | Sample out of age range. |
| <b><i>Khalsa (2016)</i></b>     | Mammillary body volume abnormalities in anorexia nervosa.                                                                                                                                    | Sample out of age range. |
| <b><i>Hoffman (1989)</i></b>    | Cerebral atrophy in anorexia nervosa: a pilot study.                                                                                                                                         | Sample out of age range. |
| <b><i>Audenaert (2003)</i></b>  | Decreased 5-HT <sub>2a</sub> Receptor Binding in Patients with Anorexia Nervosa                                                                                                              | Sample out of age range. |
| <b><i>Joos (2010)</i></b>       | Voxel-based morphometry in eating disorders: Correlation of psychopathology with grey matter volume                                                                                          | Sample out of age range. |
| <b><i>Friederich (2012)</i></b> | Grey matter abnormalities within cortico-limbic-striatal circuits in acute and weight-restored anorexia nervosa patients                                                                     | Sample out of age range. |
| <b><i>Nickel (2018)</i></b>     | Recovery of cortical volume and thickness after remission from acute anorexia nervosa                                                                                                        | Sample out of age range. |
| <b><i>Frampton (2010)</i></b>   | Do Abnormalities in Regional Cerebral Blood Flow in Anorexia Nervosa Resolve after Weight Restoration?                                                                                       | Sample out of age range. |
| <b><i>Santos (2018)</i></b>     | Registration-based methods applied to serial high-resolution T1-weighted T magnetic resonance imaging for the assessment of brain volume changes in anorexia nervosa of the restricting type | Sample out of age range. |
| <b><i>Mustafa (1992)</i></b>    | Subcortical Brain Anatomy in Anorexia and Bulimia                                                                                                                                            | Sample out of age range. |
| <b><i>Palazidou (1999)</i></b>  | Neuroradiological and neuropsychological assessment in anorexia nervosa                                                                                                                      | Sample out of age range. |
| <b><i>Nauro (2001)</i></b>      | Decreases in blood perfusion of the anterior cingulate gyri in Anorexia Nervosa Restricters assessed by SPECT image analysis                                                                 | Sample out of age range. |
| <b><i>Swayze (2002)</i></b>     | Brain Tissue Volume Segmentation in Patients with Anorexia Nervosa before and after Weight Normalization                                                                                     | Sample out of age range. |
| <b><i>Connan (2006)</i></b>     | Hippocampal volume and cognitive function in anorexia nervosa                                                                                                                                | Sample out of age range. |
| <b><i>McCormick (2008)</i></b>  | Implications of Starvation-Induced Change in Right Dorsal Anterior Cingulate Volume in Anorexia Nervosa                                                                                      | Sample out of age range. |
| <b><i>Suchan (2010)</i></b>     | Reduction of gray matter density in the extrastriate body area in women with anorexia nervosa                                                                                                | Sample out of age range. |
| <b><i>Frieling (2012)</i></b>   | Microstructural Abnormalities of the Posterior Thalamic Radiation and the Mediodorsal Thalamic Nuclei in Females With Anorexia Nervosa--A Voxel Based Diffusion Tensor Imaging (DTI) Study   | Sample out of age range. |
| <b><i>Favaro (2012)</i></b>     | Disruption of Visuospatial and Somatosensory Functional Connectivity in Anorexia Nervosa                                                                                                     | Sample out of age range. |
| <b><i>Via (2014)</i></b>        | Disruption of Brain White Matter Microstructure in Women With Anorexia Nervosa                                                                                                               | Sample out of age range. |
| <b><i>Kullmann (2014)</i></b>   | Aberrant Network Integrity of the Inferior Frontal Cortex in Women With Anorexia Nervosa                                                                                                     | Sample out of age range. |
| <b><i>Favaro (2014)</i></b>     | Effects of Obstetric Complications on Volume and Functional Connectivity of Striatum in Anorexia Nervosa Patients                                                                            | Sample out of age range. |
| <b><i>Favaro (2015)</i></b>     | Gyrification Brain Abnormalities as Predictors of Outcome in Anorexia Nervosa                                                                                                                | Sample out of age range. |
| <b><i>Canna (2016)</i></b>      | Interhemispheric functional connectivity in anorexia and bulimia nervosa.                                                                                                                    | Sample out of age range. |

|                           |                                                                                                                                                           |                          |
|---------------------------|-----------------------------------------------------------------------------------------------------------------------------------------------------------|--------------------------|
| <i>Scaife (2017)</i>      | Reduced Resting-State Functional Connectivity in Current and Recovered Restrictive Anorexia Nervosa.                                                      | Sample out of age range. |
| <i>Kohmura (2017)</i>     | Regional decrease in gray matter volume is related to body dissatisfaction in anorexia nervosa.                                                           | Sample out of age range. |
| <i>Boto(2019)</i>         | Cerebral Gray and White Matter Involvement in Anorexia Nervosa Evaluated by T1, T2, and T2* Mapping.                                                      | Sample out of age range. |
| <i>Miles (2019)</i>       | White matter microstructure in women with acute and remitted anorexia nervosa: an exploratory neuroimaging study.                                         | Sample out of age range. |
| <i>Fonville (2013)</i>    | Alterations in brain structure in adults with anorexia nervosa and the impact of illness duration.                                                        | Sample out of age range. |
| <i>Maier (2020)</i>       | Insular cell integrity markers linked to weight concern in anorexia nervosa—an MR-spectroscopy study                                                      | Sample out of age range. |
| <i>Collantoni (2020)</i>  | Cortical complexity in Anorexia Nervosa: A fractal dimension analysis                                                                                     | Sample out of age range. |
| <i>Collantoni (2020)</i>  | Functional connectivity patterns and the role of 5-httlpr polymorphism on network architecture in female patients with anorexia nervosa                   | Sample out of age range. |
| <i>Nickel (2019)</i>      | White matter abnormalities in the corpus callosum in acute and recovered anorexia nervosa patients-a diffusion tensor imaging study                       | Sample out of age range. |
| <i>Van Opstal (2015)</i>  | Hypothalamic BOLD response to glucose intake and hypothalamic volume are similar in anorexia nervosa and healthy control subjects                         | Sample out of age range. |
| <i>Yokokura (2019)</i>    | Alterations in serotonin transporter and body image-related cognition in anorexia nervosa                                                                 | Sample out of age range. |
| <i>Delvenne (1995)</i>    | Brain hypometabolism of glucose in anorexia nervosa: a PET scan study                                                                                     | Sample out of age range. |
| <i>Coman (2013)</i>       | A disorder of a vulnerable self: Anorexia nervosa patients' understanding of disorder and self in the context of fMRI brain scanning                      | Sample out of age range. |
| <i>Nagamitsu (2016)</i>   | Altered SPECT <sup>123</sup> I-iomazenil binding in the cingulate cortex of children with anorexia nervosa                                                | Sample out of age range. |
| <i>Lask (2005)</i>        | Functional Neuroimaging in Early-Onset Anorexia Nervosa                                                                                                   | Sample out of age range. |
| <i>Van Autreve (2016)</i> | Differential Neural Correlates of Set-Shifting in the Bingeing-Purging and Restrictive Subtypes of Anorexia Nervosa: An fMRI Study                        | Sample out of age range. |
| <i>Lai(2020)</i>          | Fractional amplitude of low frequency fluctuation in drug-naïve first-episode patients with anorexia nervosa: A resting-state fMRI study                  | Sample out of age range. |
| <i>Lee (2014)</i>         | Resting-state synchrony between anterior cingulate cortex and precuneus relates to body shape concern in anorexia nervosa and bulimia nervosa.            | Sample out of age range. |
| <i>Schultz (2017)</i>     | Evidence for alterations of cortical folding in anorexia nervosa.                                                                                         | Sample rec-AN.           |
| <i>Fuglset (2016)</i>     | Brain volumes and regional cortical thickness in young females with anorexia nervosa.                                                                     | Sample rec-AN.           |
| <i>Lambe (1985)</i>       | Cerebral Gray Matter Volume Deficits After Weight Recovery From Anorexia Nervosa                                                                          | Sample rec-AN.           |
| <i>Frank (2002)</i>       | Reduced 5-HT2A Receptor Binding after Recovery from Anorexia Nervosa                                                                                      | Sample rec-AN.           |
| <i>Uher (2003)</i>        | Recovery and Chronicity in Anorexia Nervosa: Brain Activity Associated with Differential Outcomes                                                         | Sample rec-AN.           |
| <i>Frank (2005)</i>       | Increased dopamine D2/D3 receptor binding after recovery from anorexia nervosa measured by positron emission tomography and [ <sup>11</sup> C]raclopride. | Sample rec-AN.           |
| <i>Wagner (2006)</i>      | Normal Brain Tissue Volumes after Long-Term Recovery in Anorexia and Bulimia Nervosa                                                                      | Sample rec-AN.           |
| <i>Bailer (2007)</i>      | Serotonin transporter binding after recovery from eating disorders                                                                                        | Sample rec-AN.           |
| <i>Wagner (2007)</i>      | Altered Reward Processing in Women Recovered From Anorexia Nervosa                                                                                        | Sample rec-AN.           |
| <i>Mühlau (2007)</i>      | Gray Matter Decrease of the Anterior Cingulate Cortex in Anorexia Nervosa                                                                                 | Sample rec-AN.           |
| <i>Oberndorfer (2011)</i> | Demand-specific alteration of medial prefrontal cortex response during an inhibition task in recovered anorexic women.                                    | Sample rec-AN.           |

|                         |                                                                                                                                               |                                      |
|-------------------------|-----------------------------------------------------------------------------------------------------------------------------------------------|--------------------------------------|
| <b>Joos (2011)</b>      | Grey matter deficit in long-term recovered anorexia nervosa patients.                                                                         | Sample rec-AN.                       |
| <b>Cowdrey (2011)</b>   | Increased neural processing of rewarding and aversive food stimuli in recovered anorexia nervosa.                                             | Sample rec-AN.                       |
| <b>Framton (2011)</b>   | Neurobiological Status at Initial Presentation Predicts Neuropsychological Functioning in Early Onset Anorexia Nervosa at Four-Year Follow Up | Sample rec-AN.                       |
| <b>Cowdrey (2011)</b>   | Neural Responses to Emotional Faces in Women Recovered From Anorexia Nervosa                                                                  | Sample rec-AN.                       |
| <b>Yau (2013)</b>       | Alterations in White Matter Microstructure in Women Recovered From Anorexia Nervosa                                                           | Sample rec-AN.                       |
| <b>Lázaro (2013)</b>    | Normal Gray and White Matter Volume After Weight Restoration in Adolescents With Anorexia Nervosa                                             | Sample rec-AN.                       |
| <b>Boehm (2016)</b>     | Partially Restored Resting-State Functional Connectivity in Women Recovered From Anorexia Nervosa                                             | Sample rec-AN.                       |
| <b>Bang (2016)</b>      | Normal gray matter volumes in women recovered from anorexia nervosa: a voxel-based morphometry study.                                         | Sample rec-AN.                       |
| <b>Bang (2018)</b>      | Normal white matter microstructure in women long-term recovered from anorexia nervosa: A diffusion tensor imaging study.                      | Sample rec-AN.                       |
| <b>Geisler (2019)</b>   | Altered global brain network topology as a trait marker in patients with anorexia nervosa.                                                    | Sample rec-AN.                       |
| <b>Kornreich (1991)</b> | CT and MR Evaluation of the Brain in Patients with Anorexia Nervosa                                                                           | Low score in NewCastle-Ottawa scale. |

**Supplemental Table S2a.** Evaluation of the eligible studies with Newcastle-Ottawa scale- **Case-Control studies.**

| <i>Study</i>                   | <i>Selection</i>       |                                               |                              |                               | <i>Comparability</i>        |                                            | <i>Exposure</i>                  |                                           |                          | <i>Total</i> |
|--------------------------------|------------------------|-----------------------------------------------|------------------------------|-------------------------------|-----------------------------|--------------------------------------------|----------------------------------|-------------------------------------------|--------------------------|--------------|
|                                | <i>Case definition</i> | <i>Representativeness of the of the cases</i> | <i>Selection of controls</i> | <i>Definition of controls</i> | <i>Comparability on age</i> | <i>Comparability on other risk factors</i> | <i>Ascertainment of exposure</i> | <i>Same method for cases and controls</i> | <i>Non-response rate</i> |              |
| <i>Blasel (2011)</i>           | 1                      | 1                                             | 0                            | 0                             | 1                           | 1                                          | 1                                | 1                                         | 1                        | 7            |
| <i>Castro-Fornieles (2007)</i> | 1                      | 1                                             | 1                            | 0                             | 1                           | 0                                          | 1                                | 1                                         | 1                        | 7            |
| <i>Schlemmer (1997)</i>        | 1                      | 0                                             | 1                            | 1                             | 1                           | 0                                          | 1                                | 1                                         | 1                        | 7            |
| <i>King (2015)</i>             | 1                      | 0                                             | 1                            | 1                             | 1                           | 1                                          | 1                                | 1                                         | 1                        | 8            |
| <i>Myrvang (2018)</i>          | 1                      | 1                                             | 1                            | 1                             | 1                           | 1                                          | 1                                | 1                                         | 1                        | 9            |
| <i>Yue (2018)</i>              | 1                      | 0                                             | 1                            | 1                             | 1                           | 1                                          | 1                                | 1                                         | 1                        | 8            |
| <i>Olivo (2018)</i>            | 1                      | 1                                             | 1                            | 1                             | 1                           | 1                                          | 1                                | 1                                         | 1                        | 9            |
| <i>Fujisawa (2015)</i>         | 1                      | 1                                             | 1                            | 1                             | 1                           | 1                                          | 1                                | 1                                         | 1                        | 9            |
| <i>Golden (1996)</i>           | 1                      | 1                                             | 0                            | 1                             | 0                           | 1                                          | 1                                | 1                                         | 1                        | 7            |
| <i>Monzon (2017)</i>           | 1                      | 0                                             | 1                            | 1                             | 1                           | 1                                          | 1                                | 1                                         | 1                        | 8            |
| <i>Akgül (2016)</i>            | 1                      | 0                                             | 0                            | 1                             | 1                           | 1                                          | 1                                | 1                                         | 1                        | 7            |
| <i>Katzman (1996)</i>          | 1                      | 1                                             | 1                            | 0                             | 0                           | 1                                          | 1                                | 1                                         | 1                        | 7            |
| <i>Neumärker (2000)</i>        | 1                      | 0                                             | 1                            | 1                             | 1                           | 1                                          | 1                                | 0                                         | 1                        | 7            |
| <i>Castro-Fornieles (2009)</i> | 1                      | 1                                             | 1                            | 1                             | 1                           | 1                                          | 1                                | 1                                         | 1                        | 9            |
| <i>Takano (2001)</i>           | 1                      | 1                                             | 1                            | 1                             | 0                           | 0                                          | 1                                | 1                                         | 1                        | 7            |
| <i>Kojima (2005)</i>           | 1                      | 1                                             | 1                            | 0                             | 0                           | 0                                          | 1                                | 1                                         | 1                        | 6            |
| <i>Travis (2015)</i>           | 1                      | 1                                             | 1                            | 1                             | 1                           | 0                                          | 1                                | 1                                         | 1                        | 8            |
| <i>Cha (2016)</i>              | 1                      | 1                                             | 0                            | 1                             | 1                           | 1                                          | 1                                | 1                                         | 1                        | 8            |
| <i>Hu (2017)</i>               | 1                      | 1                                             | 1                            | 1                             | 1                           | 1                                          | 1                                | 1                                         | 1                        | 9            |
| <i>Gaudio (2017)</i>           | 1                      | 1                                             | 1                            | 1                             | 1                           | 0                                          | 1                                | 1                                         | 1                        | 8            |
| <i>Pfuhl (2016)</i>            | 1                      | 1                                             | 1                            | 1                             | 1                           | 0                                          | 1                                | 1                                         | 1                        | 8            |
| <i>von Schwanenflug (2018)</i> | 1                      | 0                                             | 0                            | 1                             | 1                           | 0                                          | 1                                | 1                                         | 1                        | 7            |
| <i>Gaudio (2015)</i>           | 1                      | 1                                             | 1                            | 1                             | 1                           | 0                                          | 1                                | 1                                         | 1                        | 8            |
| <i>Seidel (2019)</i>           | 1                      | 1                                             | 0                            | 1                             | 1                           | 0                                          | 1                                | 1                                         | 1                        | 7            |

|                       |   |   |   |   |   |   |   |   |   |   |   |
|-----------------------|---|---|---|---|---|---|---|---|---|---|---|
| <i>Amianto (2013)</i> | 1 | 1 | 1 | 1 | 1 | 1 | 1 | 1 | 1 | 1 | 9 |
| <i>Geisler (2015)</i> | 1 | 1 | 1 | 1 | 1 | 0 | 1 | 1 | 1 | 1 | 8 |
| <i>Bohem (2014)</i>   | 1 | 1 | 1 | 1 | 1 | 0 | 1 | 1 | 1 | 1 | 8 |
| <i>Gaudio (2018)</i>  | 1 | 1 | 1 | 1 | 1 | 0 | 1 | 1 | 1 | 1 | 8 |
| <i>Uniacke (2018)</i> | 1 | 1 | 0 | 1 | 1 | 1 | 1 | 1 | 1 | 1 | 8 |
| <i>Vogel (2015)</i>   | 1 | 1 | 1 | 1 | 1 | 1 | 1 | 1 | 1 | 1 | 9 |
| <i>Olivo (2019)</i>   | 1 | 1 | 1 | 1 | 1 | 0 | 1 | 1 | 1 | 1 | 8 |

**Supplemental Table S2b.** Evaluation of the eligible studies with Newcastle-Ottawa scale- **Cohort studies.**

| <i>Study</i>                   | <i>Selection</i>          |                                 |                                  |                                     | <i>Comparability</i> |                              |                              | <i>Exposure</i>                         |                              | <i>Total</i> |
|--------------------------------|---------------------------|---------------------------------|----------------------------------|-------------------------------------|----------------------|------------------------------|------------------------------|-----------------------------------------|------------------------------|--------------|
|                                | <i>Representativeness</i> | <i>Selection of non-exposed</i> | <i>Ascertainment of exposure</i> | <i>Outcome not present at start</i> | <i>On age</i>        | <i>On other risk factors</i> | <i>Assessment of outcome</i> | <i>Long enough follow up (12months)</i> | <i>Adequacy of follow-up</i> |              |
| <b>MRI</b>                     |                           |                                 |                                  |                                     |                      |                              |                              |                                         |                              |              |
| <i>Katzman (1997)</i>          | 1                         | 1                               | 1                                | 1                                   | 1                    | 1                            | 1                            | 0                                       | 1                            | 8            |
| <i>Neumärker (2000)</i>        | 1                         | 1                               | 1                                | 1                                   | 1                    | 1                            | 1                            | 0                                       | 1                            | 8            |
| <i>Castro-Fornieles (2009)</i> | 1                         | 1                               | 1                                | 1                                   | 1                    | 1                            | 1                            | 0                                       | 1                            | 8            |
| <i>Akgül (2016)</i>            | 1                         | 1                               | 1                                | 1                                   | 1                    | 1                            | 1                            | 1                                       | 1                            | 9            |
| <i>Bernardoni (2018)</i>       | 1                         | 1                               | 1                                | 1                                   | 1                    | 1                            | 1                            | 0                                       | 1                            | 8            |
| <i>Golden (1996)</i>           | 1                         | 1                               | 1                                | 1                                   | 1                    | 1                            | 1                            | 0                                       | 1                            | 8            |
| <i>Monzon (2017)</i>           | 1                         | 1                               | 1                                | 1                                   | 1                    | 1                            | 1                            | 0                                       | 1                            | 8            |
| <b>MRI-DTI</b>                 |                           |                                 |                                  |                                     |                      |                              |                              |                                         |                              |              |
| <i>Vogel (2016)</i>            | 1                         | 1                               | 1                                | 1                                   | 1                    | 1                            | 1                            | 0                                       | 1                            | 8            |
| <i>von Schwanenflug (2018)</i> | 1                         | 1                               | 1                                | 1                                   | 1                    | 1                            | 1                            | 0                                       | 1                            | 8            |
| <b>MRS</b>                     |                           |                                 |                                  |                                     |                      |                              |                              |                                         |                              |              |
| <i>Castro-Fornieles (2007)</i> | 1                         | 1                               | 1                                | 1                                   | 1                    | 1                            | 1                            | 0                                       | 1                            | 8            |
| <b>SPECT</b>                   |                           |                                 |                                  |                                     |                      |                              |                              |                                         |                              |              |
| <i>Matsumoto (2006)</i>        | 1                         | 1                               | 1                                | 1                                   | 1                    | 1                            | 1                            | 0                                       | 1                            | 8            |
| <i>Kojima (2005)</i>           | 1                         | 1                               | 1                                | 1                                   | 1                    | 1                            | 1                            | 0                                       | 1                            | 8            |
| <i>Komatsu (2010)</i>          | 1                         | 1                               | 1                                | 1                                   | 1                    | 1                            | 1                            | 0                                       | 1                            | 8            |



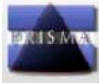

# PRISMA 2009 Checklist

| Section/topic                      | #  | Checklist item                                                                                                                                                                                                                                                       | Reported on page # |
|------------------------------------|----|----------------------------------------------------------------------------------------------------------------------------------------------------------------------------------------------------------------------------------------------------------------------|--------------------|
| <b>TITLE</b>                       |    |                                                                                                                                                                                                                                                                      |                    |
| Title                              | 1  | Identify the report as a literature review.                                                                                                                                                                                                                          | 1                  |
| <b>ABSTRACT</b>                    |    |                                                                                                                                                                                                                                                                      |                    |
| Structured summary                 | 2  | Provide a structured summary including, as applicable: background; objectives; data sources; study eligibility criteria, participants, and interventions; study appraisal and synthesis methods; results; limitations; conclusions and implications of key findings; | 1                  |
| <b>INTRODUCTION</b>                |    |                                                                                                                                                                                                                                                                      |                    |
| Rationale                          | 3  | Describe the rationale for the review in the context of what is already known about your topic.                                                                                                                                                                      | 2-3                |
| Objectives                         | 4  | Provide an explicit statement of questions being addressed with reference to participants, interventions, comparisons, outcomes, and study design (PICOS).                                                                                                           |                    |
| <b>METHODS</b>                     |    |                                                                                                                                                                                                                                                                      |                    |
| Eligibility criteria               | 5  | Specify study characteristics (e.g., PICOS, length of follow-up) and report characteristics (e.g., years considered, language, publication status) used as criteria for eligibility, giving rationale.                                                               | 3-4                |
| Information sources                | 6  | Describe all information sources (e.g., databases with dates of coverage) in the search and date last searched.                                                                                                                                                      | 3-4                |
| Search                             | 7  | Present full electronic search strategy for at least one database, including any limits used, such that it could be repeated.                                                                                                                                        | 3-4                |
| Study selection                    | 8  | State the process for selecting studies (i.e., screening, eligibility).                                                                                                                                                                                              | 3-4                |
| Risk of bias in individual studies | 9  | Describe methods used for assessing risk of bias of individual studies (including specification of whether this was done at the study or outcome level).                                                                                                             | 4                  |
| Risk of bias across studies        | 10 | Specify any assessment of risk of bias that may affect the cumulative evidence (e.g., publication bias, selective reporting within studies).                                                                                                                         | 4                  |

| Section/topic                              | #  | Checklist item                                                                                                                                                                                                                            | Reported on page # |
|--------------------------------------------|----|-------------------------------------------------------------------------------------------------------------------------------------------------------------------------------------------------------------------------------------------|--------------------|
| <b>RESULTS</b>                             |    |                                                                                                                                                                                                                                           |                    |
| Study selection                            | 11 | Give numbers of studies screened, assessed for eligibility, and included in the review, with reasons for exclusions at each stage, ideally with a flow diagram.                                                                           | 4                  |
| Study characteristics                      | 12 | For each study, present characteristics for which data were extracted (e.g., study size, PICOS, follow-up period) and provide the citations.                                                                                              | 5                  |
| Synthesis of results of individual studies | 13 | For all outcomes considered (benefits or harms), present, for each study: (a) summary of results and (b) relationship to other studies under review (e.g. agreements or disagreements in methods, sampling, data collection or findings). | 5-25               |
| <b>DISCUSSION</b>                          |    |                                                                                                                                                                                                                                           |                    |
| Summary of evidence                        | 14 | Summarize the main findings including the strength of evidence for each main outcome; consider their relevance to key groups (e.g., healthcare providers, users, and policy makers).                                                      | 26-32              |
| Limitations                                | 15 | Discuss limitations at study and outcome level (e.g., risk of bias), and at review-level (e.g., incomplete retrieval of identified research, reporting bias).                                                                             | 33                 |
| <b>CONCLUSION</b>                          |    |                                                                                                                                                                                                                                           |                    |
| Conclusions                                | 16 | Provide a general interpretation of the results in the context of other evidence, and implications for future research.                                                                                                                   | 34                 |

Adapted from: Moher D, Liberati A, Tetzlaff J, Altman DG, The PRISMA Group (2009). Preferred Reporting Items for Systematic Reviews and Meta-Analyses: The PRISMA statement. *PLoS Medicine*, 6(6), e1000097. doi:10.1371/journal.pmed1000097

For more information, visit: [www.prisma-statement.org](http://www.prisma-statement.org).
